Thoracolumbar intervertebral disc area morphometry in elderly Chinese men and women: radiographic quantifications at baseline and changes at year-4 follow-up

Jùn-Qīng Wáng, MSc <sup>a</sup>, Zoltán Káplár, DrMed <sup>a</sup>, Min Deng, MMed <sup>a</sup>, James F. Griffith, MBBCh FRCR <sup>a</sup>, Jason C. S. Leung, MSc <sup>b</sup>, Anthony WL Kwok PhD <sup>a</sup>, Timothy Kwok MBChB FRCP, Ping Chung Leung MBBS, FRCS <sup>b</sup>, Yì Xiáng J. Wáng, MMed PhD, <sup>\*a</sup>

<sup>a</sup> Department of Imaging and Interventional Radiology, Faculty of Medicine, The Chinese University of Hong Kong, New Territories, Hong Kong SAR

<sup>b</sup> JC Centre for Osteoporosis Care and Control, Faculty of Medicine, The Chinese University of Hong Kong, New Territories, Hong Kong SAR

running head: Thoracolumbar disc morphometry in elderly Chinese

\*Corresponding author:

Yì Xiáng J. Wáng MMed, PhD, Department of Imaging and Interventional Radiology, Faculty of Medicine, The Chinese University of Hong Kong, New Territories, Hong Kong SAR

Phone: +852 3505 2289

[yixiang\\_wang@cuhk.edu.hk](mailto:yixiang_wang@cuhk.edu.hk)

The manuscript submitted does not contain information about medical device(s)/drug(s). No benefits in any form have been or will be received from a commercial party related directly or indirectly to the subject of this manuscript.

**Study Design:** A population-based radiographic study with longitudinal follow-up.

**Objective:** To develop a quantitative index for lumbar disc space narrowing (DSN) evaluation in elderly subjects; to determine how DSN in the elderly is influenced by osteoporosis and gender.

**Summary of Background Data:** There is paucity of research on quantitative classification of lumbar DSN based on disc areal morphometry.

**Methods:** With the database of Osteoporotic Fractures in Men (Hong Kong) and Osteoporotic Fractures in Women (Hong Kong) Studies and those who attended the year-4 follow-up (n = 1519 for men and n = 1546 for women), data of 491 women and 592 men were randomly selected. The anterior, middle, and posterior heights, anteroposterior diameter and area of intervertebral discs (T4T5 to L4L5) were measured on lateral radiographs. Disc Area Index for Lumbar Spine (DAIL, disc area divided by the mean of the sum of square of the adjacent upper and lower vertebrae mid-height anterior-posterior diameter) was developed and compared with semi-quantitative DSN expert grading.

**Results:** DAIL correlated with semi-quantitative grading, with sensitivity and specificity varying from 87.3% to 96.8% for grade-1 DSN (<30% reduction in disc height), and 92.9 % to 100% for grade-3 DSN (>60% reduction in disc height). The thoracolumbar disc area loss among men and women during 4-years' follow-up period varied between 1.32% and 3.56%, and it was greater for women (mean: 2.44%) than for men (mean: 1.90%,  $p=0.044$ ). Majority of lumbar DSN progressions during 72 to 76 years old were progression from normal disc space to grade-1DSN . Osteoporosis was associated with greater disc area decrease, both for thoracic and lumbar discs.

**Conclusion:** Lumbar DSN can be quantified using DAIL. In elderly Chinese, intervertebral disc narrowing over a 4-year period was greater in women than men, and associated with the presence of osteoporosis.

**Key words:** lumbar spine; osteoporosis; osteopenia; bone mineral density; intervertebral disc; vertebra

1 Thoracolumbar intervertebral disc area morphometry in elderly Chinese men and women:  
2 radiographic quantifications at baseline and changes at year-4 follow-up

3

#### 4 **Introduction**

5 Spine degeneration is commonly associated with osteophytes formation, decreased bone  
6 mineral density (BMD), decrease of vertebral body middle height (i.e. increased biconcavity),  
7 increased wedge of thoracic vertebral bodies, and osteoporotic fracture. Intervertebral disc  
8 degeneration can progress to disc herniation, spinal canal stenosis, and, in conjunction with facet  
9 joint arthrosis, degenerative spondylolisthesis [1-5]. Histology studies show disc degeneration  
10 becomes apparent in men in the second decade of life, almost a decade earlier than in women  
11 [6, 7]. While young and middle-aged men are more likely to have lumbar disc degeneration than  
12 women, radiological evidences demonstrate this trend is reversed in elderly subjects, with  
13 women tending to have more severe lumbar disc degeneration than men [8, 9], and this lead to  
14 increased low back pain incidence in postmenopausal women compared with age-match men  
15 [10]. There are evidences to suggest that osteoporosis, disc degeneration (loss of disc height),  
16 and spine fracture interplay with each other. For example, disc degeneration transfers load  
17 bearing from the anterior vertebral body to the neural arch in upright postures, reduces BMD  
18 and trabecular architecture anteriorly, and predisposes vertebral body to anterior fracture when  
19 the spine is flexed [11]. Osteoporotic endplate micro-fractures and compromised healing can  
20 negatively impact disc nutrition and contribute to disc degeneration [12, 13]. Recently evidences  
21 also show that discs and vertebrae degenerate or remodel in concert [14].

22 Till now the areal loss of thoracic and lumbar disc space and their association with BMD in elderly  
23 subjects, and their gender differences, over a defined time span remain unknown. Osteoporotic  
24 Fractures in Men (Mr. OS) (Hong Kong) and Osteoporotic Fractures in Women (Ms OS) (Hong  
25 Kong) represent the first large-scale prospective cohort studies ever conducted on bone health  
26 in Asian men and women. Utilizing this database, the purpose of the current study was three-  
27 folds: 1) Till now, the diagnose of intervertebral disc space narrowing is subjective and uses a  
28 semi-quantitative grading, we aim to develop a quantitative index for lumbar disc space

29 narrowing evaluation in elderly subjects; 2) to quantify the areal loss of thoracic and lumbar disc  
30 space over four years in elderly females and males; 3) to further confirm the previous observation  
31 that osteoporosis is associated with faster disc volume loss than normal BMD subjects [15].

## 32 **Materials and methods**

33 Mr. OS (Hong Kong) and Ms OS (Hong Kong) studies design follow that of the osteoporotic  
34 fracture in men (MrOS) study performed in the United States [16]. At baseline, 2,000 Chinese  
35 men (mean age: 72.39 yrs) and 2,000 Chinese women (mean age: 72.58 yrs) in Hong Kong aged  
36 65 to 98 years were recruited from the local communities between August 2001 and March 2003  
37 [17, 18]. The recruitment criteria were established so that the study results from the cohort  
38 would be applicable to a broad population of similarly aged community-dwelling men and  
39 women. The project was designed primarily to examine the bone mineral density (BMD) of older  
40 Chinese adults prospectively for 4 years. All participants were community dwelling, able to walk  
41 without assistance, had no bilateral hip replacement and had the potential to survive the  
42 duration of a primary study based on their general medical health. The study protocol was  
43 approved by the Chinese University of Hong Kong Ethics Committee. 1,519 males (76.0%) and  
44 1,546 females (77.3%) attended the year-4 follow-up study [19]. The remaining participants were  
45 unwilling or unable to attend for follow-up or were not contactable.

46 BMD ( $\text{g}/\text{cm}^2$ ) at the total hip was measured by Hologic QDR 4,500 W densitometers (Hologic Inc.,  
47 Waltham, MA). Subjects were divided into three groups, i.e., normal BMD, osteopenia, and  
48 osteoporosis, according to World Health Organization criteria. A subject is defined as being  
49 normal if their T-score is above  $-1.0$ ; osteopenic if their T-score is between  $-1.0$  and  $-2.5$ ; and  
50 osteoporotic if their T-score is below  $-2.5$  [20]. Standard Hong Kong Chinese reference data were  
51 used for the T-score calculations [18, 21]. Spine radiographs were centered on T7 for the thoracic  
52 spine (T3-L1) and on L3 for the lumbar spine (T12-S1). Left lateral thoracic and lumbar spine  
53 radiographs were obtained by adjusting exposure parameters according to participants' body  
54 weight and height. The standard parameters were: thoracic spine: -Film/Focus Distance: 40  
55 inches, voltage 60-70 kVp, Exposure Time: 2 seconds; and lumbar spine: -Film/Focus Distance:  
56 40 inches -Imaging voltage 80-90 kVp -Exposure Time: 1sec. These radiograph parameters were

57 the same for baseline and for follow-up. Radiographs were digitized with spatial resolution of 300  
58 dpi using VIDAR's DiagnosticPRO® Advantage film digitizer, and ClinicalExpress® 4.0 software  
59 (Vidar Systems Corporation, Herndon, USA).

60 500 women and 600 men's data were randomly selected from those who attended both baseline  
61 and follow-up studies (Fig 1). This sample size estimation was based on previous quantitative MRI  
62 study of lumbar vertebrae and lumbar disc [15], and the consideration that thoracic spine discs  
63 have smaller size and more difficult to be measured reliably than lumbar discs, and elderly men  
64 demonstrates less extent of changes than elderly women with fewer of them having osteoporosis.  
65 Data from eight men and nine women were excluded due to inferior radiograph quality.  
66 Morphometric measurement was performed in each vertebra from T4 to L5 using a program  
67 written with Matlab (Matlab R2015a, Mathworks, USA). Eight digitized reference points were  
68 manually placed for each vertebra (Figure 2A), and disc dimensions including anterior height (Ha),  
69 middle height (Hm), posterior height (Hp), anteroposterior diameter (AP) and disc areas from T4  
70 to L5 were generated. The disc area was calculated as a hexagonal area composed of 4 triangles,  
71 formed by 6 intersecting lines (Figure 2B). For the correction of potential magnification  
72 differences between baseline and follow-up radiographs of the same participant, the coordinates  
73 of the points from follow-up radiographs was normalized with mid-height AP diameter of  
74 vertebral bodies at baseline. Based on past publications [22-24], the assumption was taken that  
75 vertebral mid-height AP diameter would not notably change during the 4-yr follow-up. Similar  
76 to previous reports, disc space at L5S1 was not included, as assessment of disc narrowing at this  
77 level is less reliable [17, 25]. Under the close supervision of an experienced radiologist (YXJW),  
78 two readers performed the morphometric measurement, Reader-1 (JQW) measured the  
79 radiographs of 491 females and 250 males, and reader-2 (ZK) measured the remaining 342 males.  
80 50 randomly selected radiographs were measured for reproducibility assessment. The intraclass  
81 correlation coefficient (ICC) for intra-reader repeatability was 0.988 (Ha), 0.986 (Hm), 0.979 (Hp),  
82 and 0.990 (disc area), respectively; while ICC for inter-observer repeatability was 0.950 (Ha),  
83 0.942 (Hm), 0.922 (Hp) and 0.985 (disc area), respectively.

84 Disc Area Index for Lumbar spine (DAIL) for each intervertebral level at baseline were calculated  
85 using the Equation (1, supplementary Fig 1).

$$86 \quad \text{DAIL}_{i,i+1} = \text{Area}_{i,i+1} / \bar{\sigma}; \quad \bar{\sigma} = \frac{AP_i^2 + AP_{i+1}^2}{2}; \quad \{i = 1, 2, 3, 4\} \quad (1)$$

87 Where *Area* is the intervertebral disc area, *i* = 1, 2, 3, 4 is the vertebral level, *AP* is the mid-  
88 height anteroposterior diameter of vertebral body (*AP<sub>i</sub>*: the vertebral body above the disc, *AP<sub>i+1</sub>*:  
89 the vertebral body below the disc),  $\bar{\sigma}$  is the mean of the sum of square of the adjacent upper and  
90 lower vertebrae anteroposterior diameter (*AP<sub>i</sub>* and *AP<sub>i+1</sub>*). Therefore, DAIL refers to the area of a  
91 disc divided by an area formed by mid-height anteroposterior diameters of the two adjacent  
92 vertebral bodies, and thus is unitless. As the mid-height anteroposterior diameters of the two  
93 adjacent vertebral bodies are usually unaffected by spine degeneration, and the narrower the  
94 disc space, the smaller the DAIL value. The reference standard grading was from a previous study  
95 with this dataset [17]. By experienced radiologists, lumbar disc space was visually classified into  
96 4 categories with the aid of direct measurement for borderline cases: normal (grade-0), mild  
97 narrowing (grade-1 < 30% reduction in disc height), moderate narrowing (grade-2 = 30–60%  
98 reduction in disc height), and severe narrowing (grade-3 > 60% reduction in disc height) [17, 25].  
99 DAIL threshold criteria for defining severity of DSN from grade-1 to grade-2 and grade-3 were  
100 obtained from receiver operating characteristic (ROC) analysis (Fig 3, Supplementary Fig 3-4).  
101 Using these DAIL cut-off values, the lumbar spine radiographs obtained at year-4 follow-up were  
102 used to evaluate DSN progression, and then the results were confirmed by a radiologist (MD)  
103 who participated in the previous study [17].

104 The statistical package IBM SPSS Statistics, V21.0 (IBM Corporation, IBM Corp, Armonk, New York,  
105 USA) was used for data processing. A probability level of 0.05 was used as the level of significance.

106

107

## Results

108 The demographic variables of study subjects are summarized in Table 1. There was no difference  
109 in age among the male and female groups, and there were more female subjects with  
110 osteoporosis than males (18.74% vs 3.72% at baseline, 24.24% vs 3.89% at year-4 follow-up).

111

112 The ROC analysis determined DAIL cut-off criteria for classifying lumbar DSN from grade-1 to  
113 grade-3 are shown in Table 2 and Supplementary Figures 3-4. DAIL correlated well with semi-  
114 quantitative grading, with sensitivity and specificity varying from 87.3% to 96.8% for grade-1 DSN,  
115 and 92.9 % to 100% for grade-3 DSN. DAIL performed the best at grade-3 DSN, and the  
116 performance was slightly lower for grade-1 DSN.

117

118 At the year-4 follow-up, the agreement between DAIL-based and radiologist DSN gradings had a  
119 kappa value of 0.745 for women, and 0.732 for men. The progression of lumbar DSN during 72  
120 to 76 years were mostly from normal to grade-1 (Table 3). In females the proportion of normal  
121 spaced discs decreased from 45.1% at baseline to 36.6% at year-4 follow-up, while in males the  
122 proportion of normal spaced discs decreased from 49.2% to 40.8%.

123

124 Thoracic and lumbar lateral disc area decreases during 4-years follow-up period are shown in  
125 table 4 (supplementary table 1 and 2). There was a statistically significant trend that lower hip  
126 BMD measured at baseline year was associated with greater disc area loss during the 4-year  
127 period. The thoraco-lumbar disc area losses among men and women during 4 years' follow-up  
128 period varied between 1.32% and 3.56%, and it was greater for women (mean: 2.44%) than for  
129 men (mean: 1.90%,  $p = 0.044$ , Fig 4). An overall trend was noted that caudal discs had higher  
130 percentage area decrease than cephalad discs. Both for females and males, in the thoracic spine  
131 there was a greater percentage disc area loss in mid-thoracic region than lower thoracic region  
132 (Fig 4).

133

134

## Discussion

135

136 This study is the first to investigate the influence of ageing and osteoporosis on the morphology  
137 of both thoracic and lumbar intervertebral discs, using quantitative radiographic data for both  
138 genders selected from an elderly population at baseline and at year-4 follow-up. One strength of

139 this study is that men and women of similar age and from the same community-based population  
140 were investigated, thereby enabling men and women to be directly compared.

141

142 DSN has been traditionally semi-quantitatively graded by experienced radiologists/physicians [13,  
143 16]. However, such semi-quantitative grading is subjective, making it difficult for epidemiological  
144 study and longitudinal follow-up. Our study developed DAIL, which can quantitatively classify  
145 lumbar disc space into normal and DSN. The DAIL criteria was tested to compute the DSN  
146 progression at year-4 follow-up, and showed good agreement between results of DAIL-based  
147 reads and radiologist-based reads, with an overall kappa value of 0.745 for women, and 0.732 for  
148 men. These kappa values are similar to the inter-reader reproducibility of a kappa value of 0.72  
149 by two experienced radiologists, which was obtained using the baseline L1/L2- L4/L5 radiographs  
150 [17]. In addition to the mild/moderate/severe DSN criteria used in this study, other cut-off values  
151 have been proposed. For example, Mimura *et al* (1994) proposed normal, and mild (>75%),  
152 moderate (>50%), and severe (>25%), and very severe (<25%) DNS [26]. It should be noted the  
153 DAIL cut-off criteria can be re-adjusted to meet these criteria. Computer-aided segmentations  
154 for both vertebral body and disc area on lateral radiograph have been developed [27-30]. It is  
155 expected that this DAIL criteria method will aid in computerized disc segmentation and automatic  
156 DSN grading. On the other hand, visual radiological assessment of radiographs can derive  
157 additional information such as discrete endplate defects (e.g. Schmorl's nodes), the presence of  
158 marginal vertebral body osteophytes, etc., all of which give valuable additional information  
159 concerning degenerative changes of the spine. Therefore DAIL cannot replace expert evaluation  
160 of lumbar radiographs.

161

162 Recently evidences suggest relative estrogen deficiency may contribute to the accelerated disc  
163 degeneration seen in postmenopausal women [8; 9; 31; 32], which in turn is associated increased  
164 prevalence of lower back pain [10]. The current study showed during the 4-years follow-up period  
165 there was greater lateral disc area loss in females, and during the period there were more DSN  
166 grade progresses in women than in men. This result differs from the report of Gambacciani *et al*  
167 [28]. Gambacciani *et al* reported after menopause disc space shows a progressive decrease that



168 almost entirely occurs in the first 5–10 years since menopause. The results of this study, i.e.  
169 females have faster disc space narrowing than male even 20 years after menopause, concur with  
170 previous reports of Wang *et al* [17] and De Schepper *et al* [25]. Our results also showed the  
171 lumbar DSN progression mainly occurred from normal disc space to grade-1 DSN in both genders  
172 during the follow-up period (7.7 % for women, 5.1 % for men).

173 A trend was noted that caudal discs had higher lateral area decrease rate than cephalad discs (Fig  
174 4). It has been previously recognized that lumbar discs are more likely to undergo disc  
175 degeneration than thoracic discs [33], lower lumbar discs are more likely to undergo severe  
176 degeneration than upper lumbar discs [34]. Interestingly, both for females and males, in the  
177 thoracic spine there was greater disc area loss in mid-thoracic region than lower thoracic region.  
178 This result may be associated with curvature of the spine. The parts with greater spine curvature,  
179 i.e. mid-thoracic region and L4/L5, tend to loss lateral disc area more than parts with less spine  
180 curvature. Adams *et al* [35] suggested that there are two types of disc degeneration. 'Endplate-  
181 driven' disc degeneration involves endplate defects and inwards collapse of the annulus, mostly  
182 affects discs in the upper lumbar and thoracic spine, usually is associated with compressive  
183 injuries. 'Annulus-driven' disc degeneration involves a radial fissure and/or a disc prolapse,  
184 mostly affects discs in the lower lumbar spine, and is associated with repetitive bending and  
185 lifting. Lower lumbar discs are subjected to greater loading in bending, and so are more  
186 susceptible to degenerative changes (including disc prolapse) which arise from bending injuries  
187 to the annulus. Mid-thoracic discs are more likely to sustain compression injury to an endplate.  
188 Therefore, the results of this study may support the observation that two types of degeneration  
189 phenotype exist [35].

190 A trend was significant for a lower baseline BMD associated with a greater decrease of lateral  
191 disc areas, both for thoracic and lumbar discs among females and males. Previous volumetric MR  
192 data suggested that although lower BMD is associated with greater disc middle height and  
193 increased biconvexity, lower BMD is accompanied by a decrease in disc volume [15].  
194 Osteoporosis can cause endplate thinning and micro-fracture which in turn lead to compromised  
195 endplate healing, and add calcification and decrease the vascularization in the endplates adjacent  
196 to the degenerated discs, which subsequently exacerbated degeneration of the associated discs

197 [13, 36-38]. It is noted that for osteoporotic subjects in this study, elderly men and elderly  
198 women had similar extent of disc area loss during the 4-years follow-up (table 4).

199 There are a number of limitations of this study. The DAIL criteria was validated at year-4 follow-  
200 up and compared with radiologist reads. However, radiologist DSN grading is itself subjective and  
201 could not be considered as golden standard. The DAIL criteria was only validated in elderly  
202 Chinese population, how it should be adjusted in younger population or other ethnic groups  
203 remain to be further studied. The year-4 follow-up quantification was based on the assumption  
204 that there was no change in vertebral mid-height horizontal AP diameter. Though this is a  
205 reasonable consideration for the 4-years follow-up period, this may not be absolutely true for  
206 individual cases.

207 In conclusion, the DAIL proposed in this study has a good performance in identifying DSN and  
208 may help to standardize automatic grading. In elderly Chinese, intervertebral disc narrowing over  
209 a 4 year period was greater in women than men, and associated with the presence of  
210 osteoporosis, and was greatest in the lower lumbar spine.

| TABLE 1. Demographics of Study Subjects                                     |                    |                    |                    |                    |
|-----------------------------------------------------------------------------|--------------------|--------------------|--------------------|--------------------|
|                                                                             | Women (N = 491)    |                    | Men (N = 592)      |                    |
|                                                                             | BL                 | FU                 | BL                 | FU                 |
| Mean age (yrs) ± SD (range) #                                               | 71.9 ± 4.8 (65-91) | 75.7 ± 4.9 (68-95) | 71.7 ± 4.5 (65-89) | 75.5 ± 4.6 (68-93) |
| Mean height (cm) ± SD                                                       | 151.7 ± 5.2        | 151.1 ± 5.3        | 163.2 ± 5.5        | 162.8 ± 5.5        |
| Mean weight (kg) ± SD                                                       | 55.3 ± 8.3         | 54.5 ± 8.6         | 63.3 ± 8.8         | 62.5 ± 8.7         |
| Normal BMD subjects                                                         | 135/491 (27.49%)   | 120/491 (24.44%)   | 311/592 (52.53%)   | 297/592 (50.17%)   |
| Osteopenia subjects                                                         | 264/491 (53.77%)   | 252/491 (51.32%)   | 259/592 (43.75%)   | 272/592 (45.95%)   |
| Osteoporosis subjects                                                       | 92/491 (18.74%)    | 119/491 (24.24%)   | 22/592 (3.72%)     | 23/592 (3.89%)     |
| BL: baseline; FU: year-4 follow-up; # <i>p</i> for women vs men at BL=0.508 |                    |                    |                    |                    |

| TABLE 2. Receiver operating characteristic (ROC) analysis of DAIL-based DSN Classification for lumbar discs at Baseline |             |             |             |             |             |             |             |             |             |             |             |             |
|-------------------------------------------------------------------------------------------------------------------------|-------------|-------------|-------------|-------------|-------------|-------------|-------------|-------------|-------------|-------------|-------------|-------------|
|                                                                                                                         | L1L2        |             |             | L2L3        |             |             | L3L4        |             |             | L4L5        |             |             |
|                                                                                                                         | G1          | G2          | G3          | G1          | G2          | G3          | G1          | G2          | G3          | G1          | G2          | G3          |
| Females                                                                                                                 |             |             |             |             |             |             |             |             |             |             |             |             |
| AUC                                                                                                                     | 0.96        | 0.94        | 0.99        | 0.94        | 0.97        | 0.99        | 0.96        | 0.97        | 1.00        | 0.98        | 0.97        | 0.98        |
| 95% CI                                                                                                                  | 0.946-0.979 | 0.910-0.977 | 0.976-1.00  | 0.919-0.967 | 0.955-0.994 | 0.985-1.000 | 0.947-0.980 | 0.960-0.990 | 0.994-1.000 | 0.964-0.992 | 0.951-0.984 | 0.951-1.000 |
| <i>p</i>                                                                                                                | <0.0001     | <0.0001     | <0.0001     | <0.0001     | <0.0001     | <0.0001     | <0.0001     | <0.0001     | <0.0001     | <0.0001     | <0.0001     | <0.0001     |
| Sensitivity (%)                                                                                                         | 94.2        | 92.3        | 92.9        | 87.3        | 92.5        | 94.9        | 93.8        | 95.1        | 100.0       | 96.8        | 92.3        | 94.9        |
| Specificity (%)                                                                                                         | 92.1        | 86.8        | 97.2        | 94.2        | 95.2        | 98.0        | 88.6        | 90.5        | 97.4        | 94.3        | 89.0        | 97.7        |
| DAIL cut-off value                                                                                                      | 0.2214      | 0.1706      | 0.1137      | 0.2378      | 0.1787      | 0.1147      | 0.2625      | 0.2025      | 0.1208      | 0.3008      | 0.2244      | 0.1253      |
| Males                                                                                                                   |             |             |             |             |             |             |             |             |             |             |             |             |
| AUC                                                                                                                     | 0.96        | 0.98        | 1.00        | 0.96        | 0.98        | 0.99        | 0.97        | 0.99        | 1.00        | 0.98        | 0.98        | 1.00        |
| 95% CI                                                                                                                  | 0.950-0.979 | 0.962-0.999 | 1.000-1.000 | 0.937-0.976 | 0.971-0.998 | 0.976-1.000 | 0.954-0.984 | 0.984-0.999 | 0.995-1.000 | 0.966-0.991 | 0.967-0.992 | 0.989-1.000 |
| <i>p</i>                                                                                                                | <0.0001     | <0.0001     | <0.0001     | <0.0001     | <0.0001     | <0.0001     | <0.0001     | <0.0001     | <0.0001     | <0.0001     | <0.0001     | <0.0001     |
| Sensitivity (%)                                                                                                         | 92.3        | 92.9        | 100.0       | 90.5        | 96.4        | 92.9        | 92.3        | 95.5        | 100.0       | 95.2        | 92.0        | 97.9        |
| Specificity (%)                                                                                                         | 91.2        | 96.4        | 100.0       | 91.0        | 92.6        | 100.0       | 95.6        | 97.1        | 97.0        | 92.7        | 95.2        | 96.9        |
| DAIL cut-off value                                                                                                      | 0.2345      | 0.1775      | 0.1157      | 0.2662      | 0.1995      | 0.1208      | 0.2784      | 0.2185      | 0.1552      | 0.3194      | 0.2484      | 0.1574      |
| DSN: disc space narrowing; AUC: area under the curve; G1 G2, G3: DSN of grade 1, 2, and 3, respectively.                |             |             |             |             |             |             |             |             |             |             |             |             |

| TABLE 3. Progress of Lumbar Disc Space Narrowing During the 4-Years Follow-Up Period for Women and for Men (based on DAIL read) |                    |                  |              |               |            |
|---------------------------------------------------------------------------------------------------------------------------------|--------------------|------------------|--------------|---------------|------------|
| Disc Level                                                                                                                      | DSN classification | Women Baseline # | Women Yr-4 # | Men Baseline# | Men Yr-4 # |
| Total (L1L2 – L4L5)                                                                                                             | Grade 1            | 30.40%           | 38.14%       | 33.61%        | 38.72%     |
| Total (L1L2 – L4L5)                                                                                                             | Grade 2            | 17.57%           | 17.92%       | 13.22%        | 14.44%     |
| Total (L1L2 – L4L5)                                                                                                             | Grade 3            | 6.93%            | 7.38%        | 3.93%         | 6.04%      |
| L1L2                                                                                                                            | Grade 1            | 25.66%           | 41.96%       | 28.55%        | 35.64%     |
|                                                                                                                                 | Grade 2            | 10.59%           | 12.22%       | 4.73%         | 6.93%      |
|                                                                                                                                 | Grade 3            | 5.50%            | 6.31%        | 1.52%         | 2.53%      |
| L2L3                                                                                                                            | Grade 1            | 27.90%           | 37.07%       | 31.93%        | 38.34%     |
|                                                                                                                                 | Grade 2            | 11.41%           | 12.02%       | 9.46%         | 12.50%     |
|                                                                                                                                 | Grade 3            | 7.74%            | 8.15%        | 2.36%         | 3.38%      |
| L3L4                                                                                                                            | Grade 1            | 31.57%           | 35.85%       | 35.14%        | 39.53%     |
|                                                                                                                                 | Grade 2            | 17.92%           | 18.53%       | 11.15%        | 12.50%     |
|                                                                                                                                 | Grade 3            | 6.11%            | 6.31%        | 3.72%         | 7.26%      |
| L4L5                                                                                                                            | Grade 1            | 36.46%           | 37.68%       | 38.85%        | 41.39%     |
|                                                                                                                                 | Grade 2            | 30.35%           | 28.92%       | 27.53%        | 25.84%     |
|                                                                                                                                 | Grade 3            | 8.35%            | 8.76%        | 8.11%         | 10.98%     |

DSN: disc space narrowing. #: the portions of total male/female subjects classified with a specific DSN grade.

| TABLE 4. Female and Male Lateral Intervertebral Disc Area loss in 4-Years among normal BMD, Osteopenia, and Osteoporosis subjects |                                               |                        |
|-----------------------------------------------------------------------------------------------------------------------------------|-----------------------------------------------|------------------------|
| Female                                                                                                                            | Estimated Means of Disc Area loss in 4 years* |                        |
|                                                                                                                                   | Thoracic Discs (mean±SD)                      | Lumbar Discs (mean±SD) |
| Total (n = 491)                                                                                                                   | 1.74% ± 0.058                                 | 3.56% ± 0.046          |
| Normal BMD (n = 135)                                                                                                              | 1.23% (0.005)                                 | 2.51% (0.004)          |
| Osteopenia (n = 264)                                                                                                              | 1.52% (0.004)                                 | 3.67% (0.003)          |
| Osteoporosis (n = 92)                                                                                                             | 3.10% (0.007)                                 | 4.79% (0.005)          |
| <i>p</i> in linear trend                                                                                                          | 0.037                                         | 0.001                  |
| Male                                                                                                                              |                                               |                        |
| Total (n = 592)                                                                                                                   | 1.32% ± 0.066                                 | 2.84% ± 0.042          |
| Normal BMD (n = 311)                                                                                                              | 0.85% (0.004)                                 | 2.30% (0.002)          |
| Osteopenia (n = 259)                                                                                                              | 1.66% (0.004)                                 | 3.34% (0.003)          |
| Osteoporosis (n = 22)                                                                                                             | 3.89% (0.014)                                 | 4.42% (0.009)          |
| <i>p</i> in linear trend                                                                                                          | 0.042                                         | 0.026                  |

\* Disc Area loss in 4 years = [(baseline area- follow-up area)/baseline area] × 100%, with analysis of covariance (ANCOVA) and adjustment of BMI (body mass index) and age at baseline.

## Figures legends

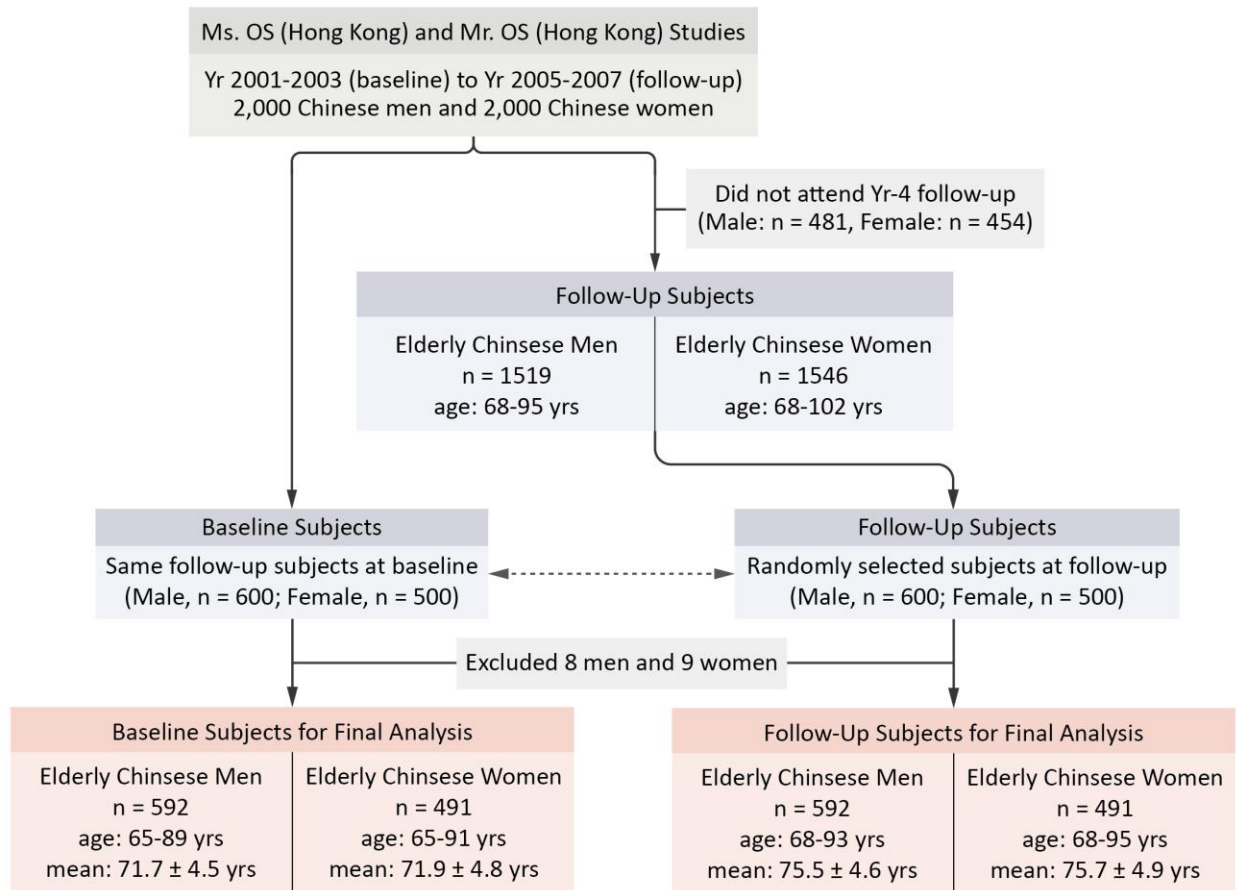

Figure 1. The flow chart shows the selection of study subjects.

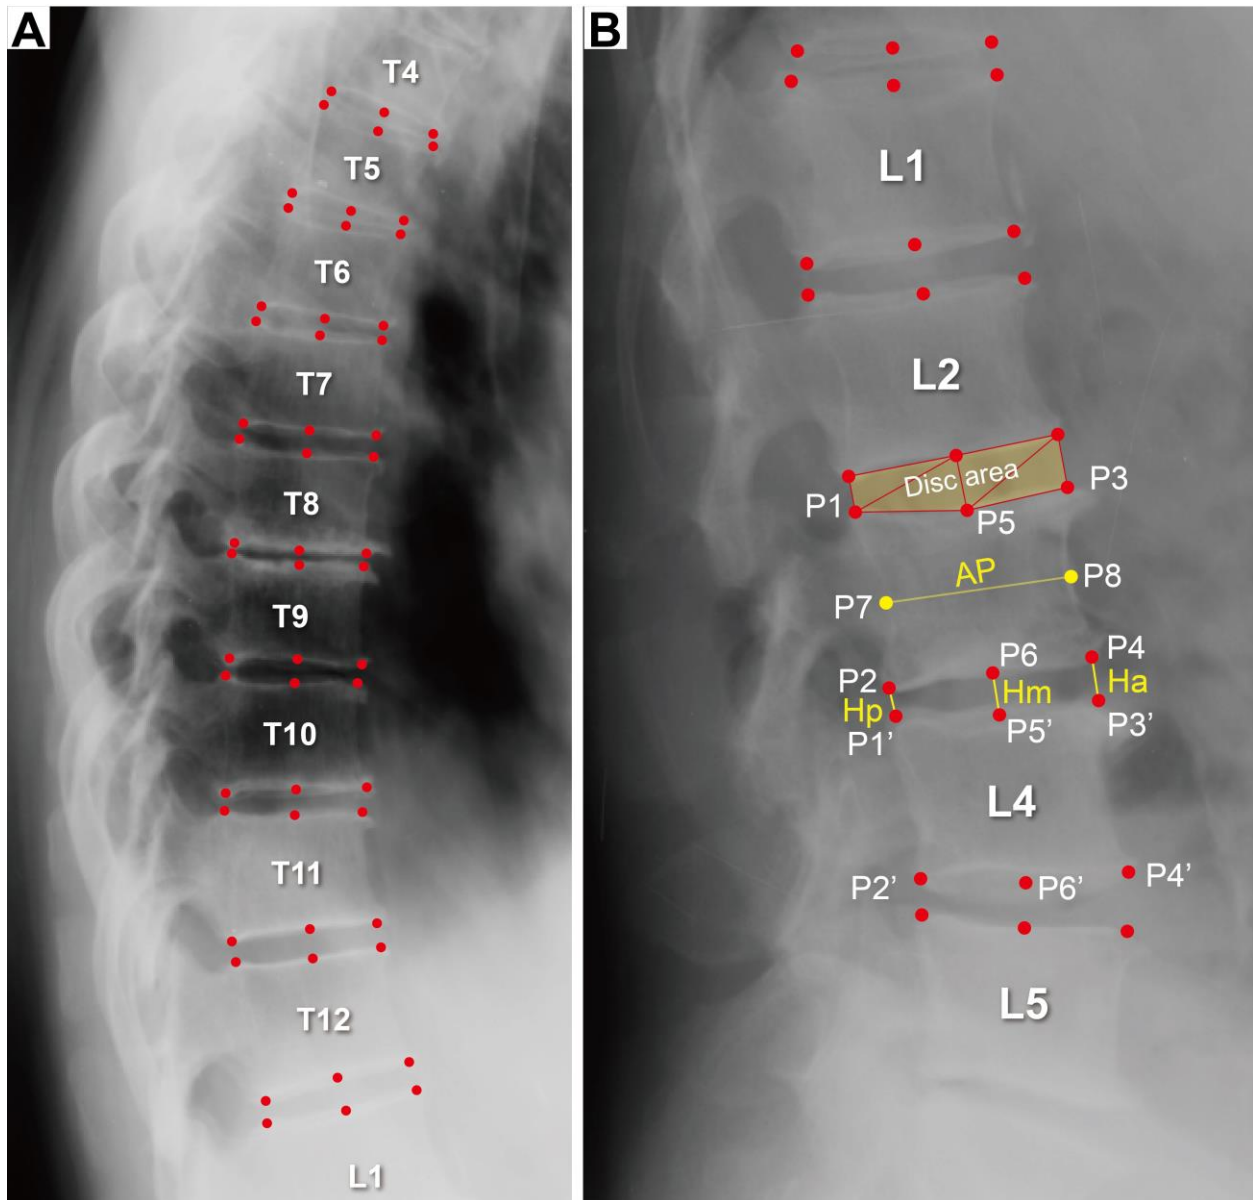

Figure 2. 8-point vertebral body and disc morphometry of spinal radiograph. Four contour points (P1-P4) were identified at the four corners of the vertebral body, two midpoints (P5 and P6) were marked at middle of the upper and lower endplates, and additional two points (P7 and P8) were positioned on the middle of the ventral (P1-P2) and dorsal (P3-P4) lines (A). The disc area is presented as a hexagonal area composed of 4 triangles (B). When scoliosis exists and the endplate shows double-lines, points P5 and P6 are placed at the middle points of the two double-lines.

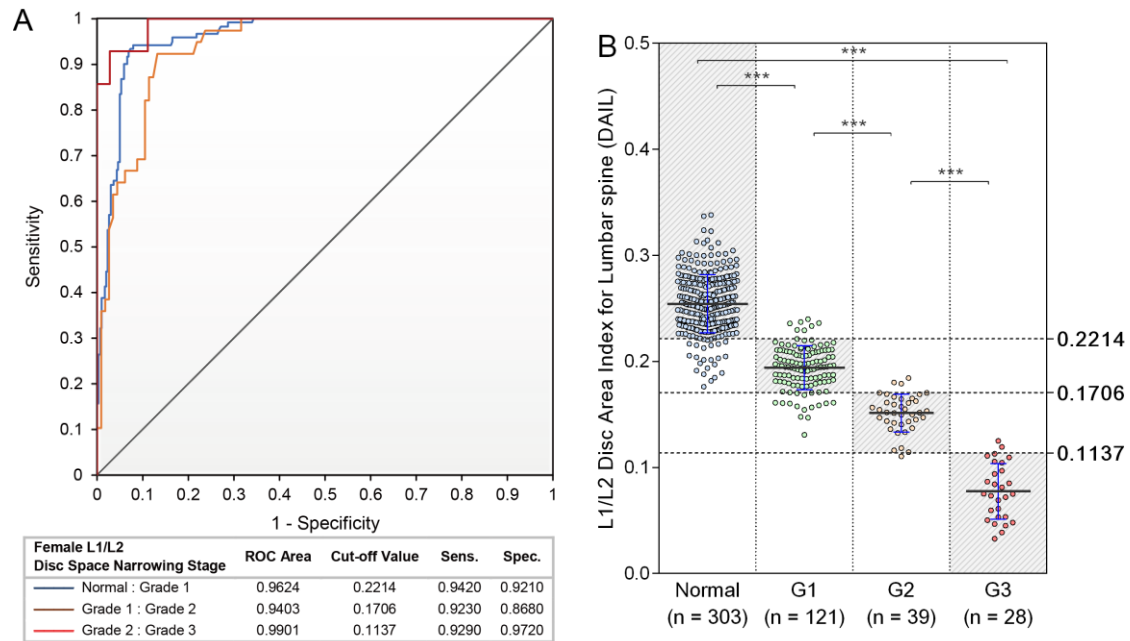

Figure 3. A: an example of ROC curve and diagnostic ability for L1L2 DSN in women; B: scatter plot of L1L2 DAILs which correlate with normal disc space, grade 1, 2 and 3 DSN. Defined optimal cut-off DAILs for DSN grading are indicated by horizontal dash line (more examples see supplementary Figures).

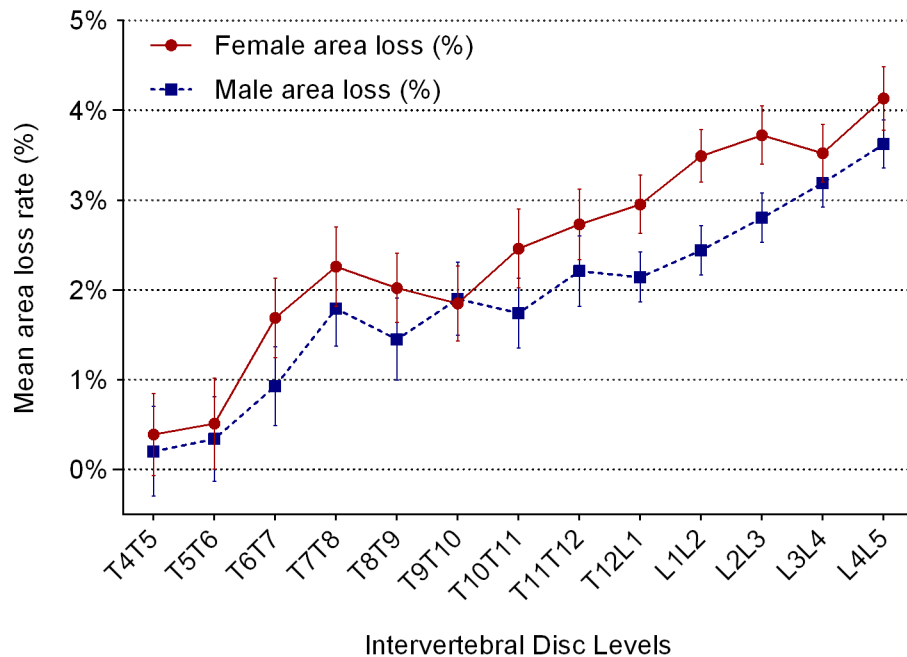

Figure 4. Percentage lateral disc area decrease (mean ± standard deviation) at individual levels during 4-years follow-up, calculated by  $[(\text{disc area at baseline} - \text{disc area at follow-up}) / \text{disc area at baseline period}]$ . Female subjects have a higher lateral disc area loss rate than males at each disc levels.

## References

1. Brinjikji W, Diehn FE, Jarvik JG, Carr CM, Kallmes DF, Murad MH, Luetmer PH. MRI Findings of Disc Degeneration are More Prevalent in Adults with Low Back Pain than in Asymptomatic Controls: A Systematic Review and Meta-Analysis. *Am J Neuroradiol*. 2015;36:2394-9.
2. Brinjikji W, Luetmer PH, Comstock B, Bresnahan BW, Chen LE, Deyo RA, Halabi S, Turner JA, Avins AL, James K, Wald JT, Kallmes DF, Jarvik JG. Systematic literature review of imaging features of spinal degeneration in asymptomatic populations. *Am J Neuroradiol*. 2015;36:811-6
3. Lee SY, Kim TH, Oh JK, Lee SJ, Park MS. Lumbar Stenosis: A Recent Update by Review of Literature. *Asian Spine J*. 2015;9:818-28.



4. Wáng YX, Káplár Z, Deng M, Leung JC. Lumbar degenerative spondylolisthesis epidemiology: a systemic review with a focus on gender-specific and age-specific prevalence. *J Orthop Translat*. 2017; 11: 39-52
5. Raastad J, Reiman M, Coeytaux R, Ledbetter L, Goode AP. The association between lumbar spine radiographic features and low back pain: a systematic review and meta-analysis. *Semin Arthritis Rheum* 2015;44:571-85.
6. Miller JA, Schmatz C, Schultz AB. Lumbar disc degeneration: correlation with age, sex, and spine level in 600 autopsy specimens. *Spine* 1988;13:173–8.
7. Lebkowski WJ. [Autopsy evaluation of the extent of degeneration of the lumbar intervertebral discs] (In Polish). *Pol Merkur Lekarski* 2002;13: 188–90
8. Wang YX, Griffith JF. Effect of menopause on lumbar disc degeneration: potential etiology. *Radiology* 2010;257:318–20.
9. Wang YX, Postmenopausal Chinese women show accelerated lumbar disc degeneration compared with Chinese men. *J Orthop Translat* 2015;3:205-11.
10. Wang YX, Wáng JQ, Káplár Z. Increased low back pain prevalence in females than in males after menopause age: evidences based on synthetic literature review. *Quant Imaging Med Surg*. 2016;6:199-206.
11. Adams MA, Pollintine P, Tobias JH, Wakley GK, Dolan P. Intervertebral disc degeneration can predispose to anterior vertebral fractures in the thoracolumbar spine. *J Bone Miner Res*. 2006;21:1409-16.
12. Wang YX, Griffith JF. Menopause causes vertebral endplate degeneration and decrease in nutrient diffusion to the intervertebral discs. *Med Hypotheses* 2011;77:18-20.
13. Moore RJ. The vertebral endplate: disc degeneration, disc regeneration. *Eur Spine J* 2006;15 Suppl 3:S333-S337
14. Videman T, Battié MC, Gibbons LE, Gill K. Aging changes in lumbar discs and vertebrae and their interaction: a 15-year follow-up study. *Spine J* 2014;14:469-78.

15. Kwok AW, Wang YX, Griffith JF, Deng M, Leung JC, Ahuja AT, Leung PC. Morphological changes of lumbar vertebral bodies and intervertebral discs associated with decrease in bone mineral density of the spine: a cross-sectional study in elderly subjects. *Spine* 2012;37:E1415–21.
16. Orwoll E, Blank JB, Barrett-Connor E, Cauley J, Cummings S, Ensrud K, Lewis C, Cawthon PM, Marcus R, Marshall LM, McGowan J, Phipps K, Sherman S, Stefanick ML, Stone K. Design and baseline characteristics of the osteoporotic fractures in men (MrOS) study- a large observational study of the determinants of fracture in older men. *Contemp Clin Trials* 2005;26:569–85.
17. Wang YX, Griffith JF, Zeng XJ, Deng M, Kwok AW, Leung JC, Ahuja AT, Kwok T, Leung PC. Prevalence and sex difference of lumbar disc space narrowing in elderly Chinese men and women: osteoporotic fractures in men (Hong Kong) and osteoporotic fractures in women (Hong Kong) studies. *Arthritis Rheum* 2013;65:1004–10.
18. Lynn HS, Lau EM, Au B, Leung JC. Bone mineral density reference norms for Hong Kong Chinese. *Osteoporos Int* 2005;16:1663–8.
19. Wáng YX, Deng M, Griffith JF, Kwok AW, Leung JC, Ahuja AT, Kwok T, Leung PC. Lumbar Spondylolisthesis Progression and De Novo Spondylolisthesis in Elderly Chinese Men and Women: A Year-4 Follow-up Study. *Spine* 2016;41:1096-103.
20. Assessment of risk fracture and its application to screening for postmenopausal osteoporosis: report of a WHO study group. *World Health Organ Tech Rep Ser* 1994;843:1–129.
21. The Osteoporosis Society of Hong Kong (OSHK). 2013 OSHK guideline for clinical management of postmenopausal osteoporosis in Hong Kong. *Hong Kong Med J.* 2013;19 Suppl 2:1-40.
22. Videman T, Battié MC, Gibbons LE, Gill K. Aging changes in lumbar discs and vertebrae and their interaction: a 15-year follow-up study. *Spine J.* 2014;14:469-78.
23. Cheung KM, Zhang YG, Lu DS, Luk KD, Leong JC. Reduction of disc space distraction after anterior lumbar interbody fusion with autologous iliac crest graft. *Spine* 2003;28:1385-9.
24. Choi JY, Sung KH. Subsidence after anterior lumbar interbody fusion using paired stand-alone rectangular cages. *Eur Spine J.* 2006;15:16-22.

25. De Schepper EI, Damen J, van Meurs JB, Ginai AZ, Popham M, Hofman A, Koes BW, Bierma-Zeinstra SM. The association between lumbar disc degeneration and low back pain: the influence of age, gender, and individual radiographic features. *Spine* 2010;35:531–6.
26. Mimura M, Panjabi MM, Oxland TR, Crisco JJ, Yamamoto I, Vasavada A. Disc degeneration affects the multidirectional flexibility of the lumbar spine. *Spine* 1994;19:1371-80.
27. Hwang D, Kim S, Abeydeera NA, Statum S, Masuda K, Chung CB, Siriwanarangsun P, Bae WC. Quantitative magnetic resonance imaging of the lumbar intervertebral discs. *Quant Imaging Med Surg* 2016;6:744-755.
28. Weiss KL, Storrs JM, Banto RB. Automated spine survey iterative scan technique. *Radiology* 2006;239:255-62.
29. Camilus KS, Govindan VK. A review on graph based segmentation. *International Journal of Image, Graphics and Signal Processing* 2012;4:1-13.
30. Michopoulou SK, Costaridou L, Panagiotopoulos E, Speller R, Panayiotakis G, Todd-Pokropek A. Atlas-based segmentation of degenerated lumbar intervertebral discs from MR images of the spine. *IEEE Trans Biomed Eng* 2009;56:2225-31.
31. Wang YX. Menopause as a potential cause for higher prevalence of low back pain in women than in age-matched men. *J Orthop Translat* 2017; 8:1-4
32. Gambacciani M, Pepe A, Cappagli B, Palmieri E, Genazzani AR. The relative contributions of menopause and aging to postmenopausal reduction in intervertebral disk height. *Climacteric*. 2007;10:298-305.
33. Weiler C, Schietzsch M, Kirchner T, Nerlich AG, Boos N, Wuertz K. Age-related changes in human cervical, thoracal and lumbar intervertebral disc exhibit a strong intra-individual correlation. *Eur Spine J*. 2012;21 Suppl 6:S810-8.
34. Wang YX, Griffith JF, Ma HT, Kwok AW, Leung JC, Yeung DK, Ahuja AT, Leung PC. Relationship between gender, bone mineral density, and disc degeneration in the lumbar spine: a study in elderly subjects using an eight-level MRI-based disc degeneration grading system. *Osteoporos Int* 2011;22:91–96

35. Adams MA, Dolan P. Intervertebral disc degeneration: evidence for two distinct phenotypes. *J Anat.* 2012;221:497-506
36. Wang YX, Griffith JF. Menopause causes vertebral endplate degeneration and decrease in nutrient diffusion to the intervertebral discs. *Med Hypotheses.* 2011;77:18–20.
37. Zhong R, Wei F, Wang L, Cui S, Chen N, Liu S, Zou X. The effects of intervertebral disc degeneration combined with osteoporosis on vascularization and microarchitecture of the endplate in rhesus monkeys. *Eur Spine J.* 2016;25:2705-15.
38. Wang L, Cui W, Kalala JP, Hoof TV, Liu BG. To investigate the effect of osteoporosis and intervertebral disc degeneration on the endplate cartilage injury in rats. *Asian Pac J Trop Med.* 2014;7:796-800.

## Thoracolumbar intervertebral disc area morphometry in elderly Chinese men and women: radiographic quantifications at baseline and changes at year-4 follow-up

---

**Supplement Figure 1.** Illustration of relationship of disc area vs. mid-height anterior-posterior (AP) diameter of two adjacent vertebral bodies.

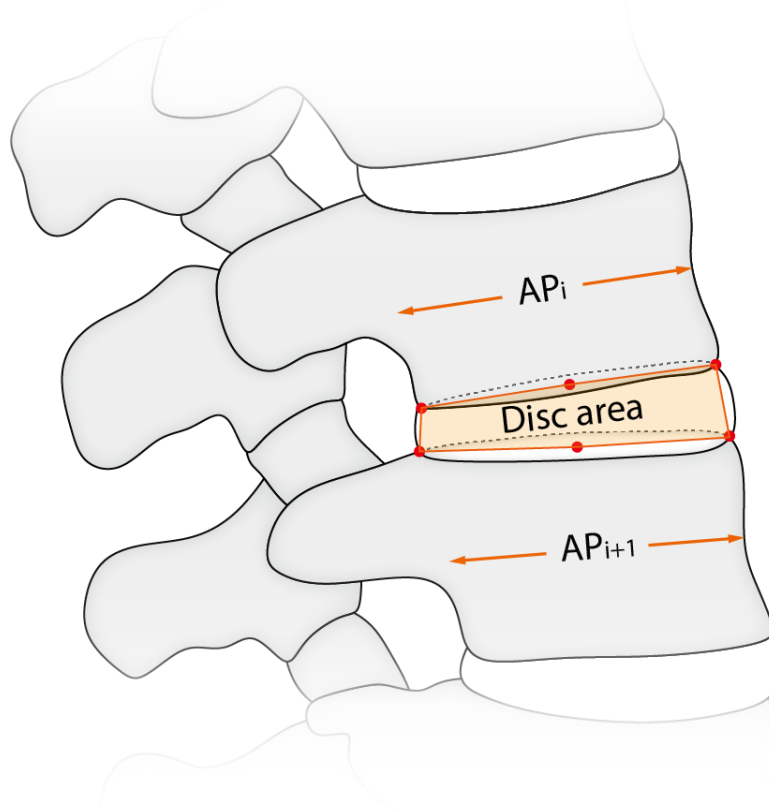

**Supplement Figure 2.** Illustrative examples of visual grading of disc space narrowing. Lumbar disc space is classified into 4 categories: normal (grade 0), mild narrowing (grade-1 < 30% reduction in disc height), moderate narrowing (grade-2 = 30–60% reduction in disc height), and severe narrowing (grade-3 > 60% reduction in disc height).

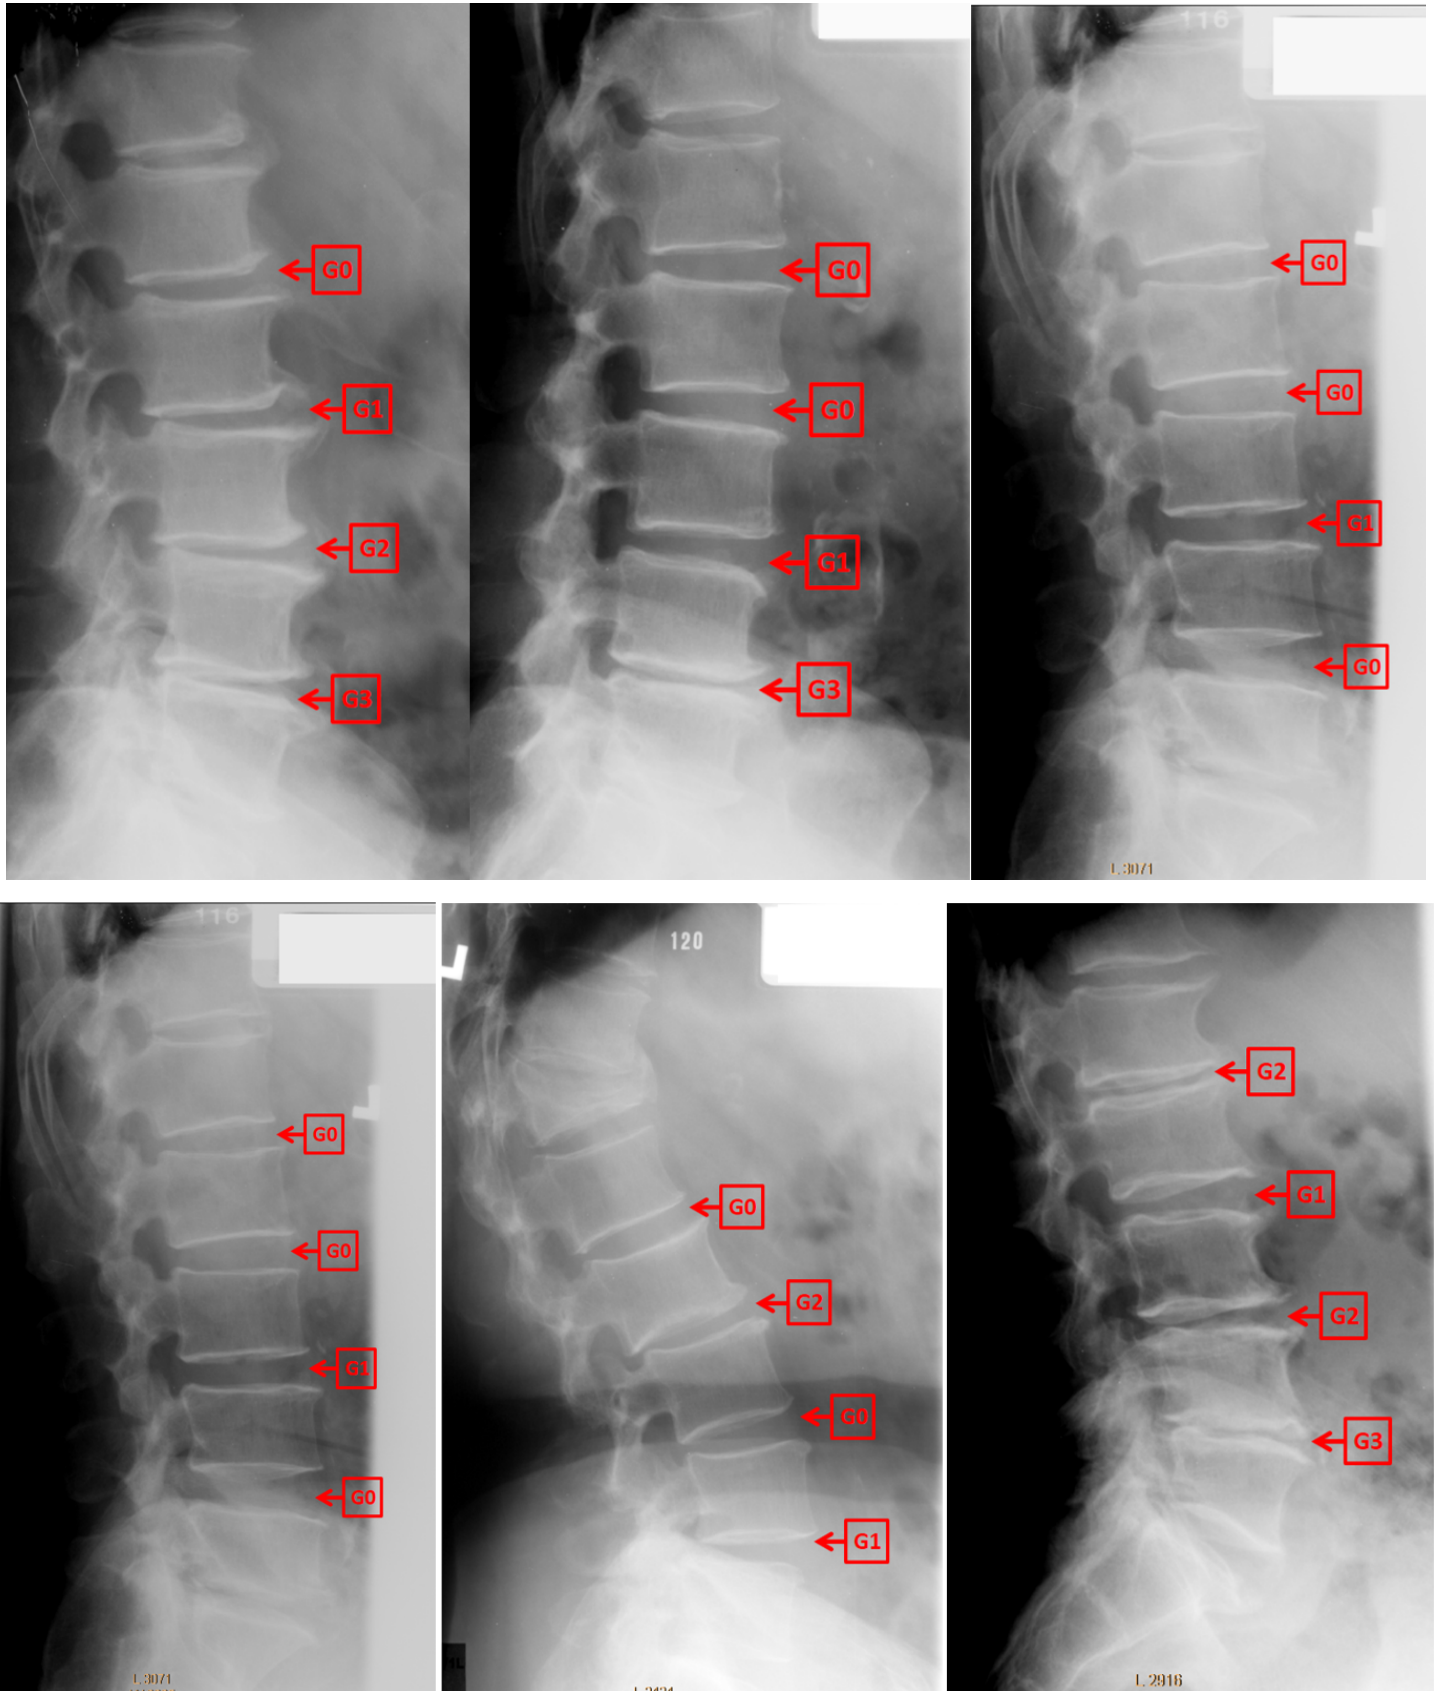

**Supplement Figure 3.** Correlations between each Individual DAIL (Disc Area Index for Lumbar spine) and defined semi-quantitative doi: grading at different disc Levels among women and men. A, Female L1/L2. B, Female L2/L3. C, Female L3/L4. D, Female L4/L5. E, Male L1/L2. F, Male L2/L3. G, Male L3/L4. H, Male L4/L5.

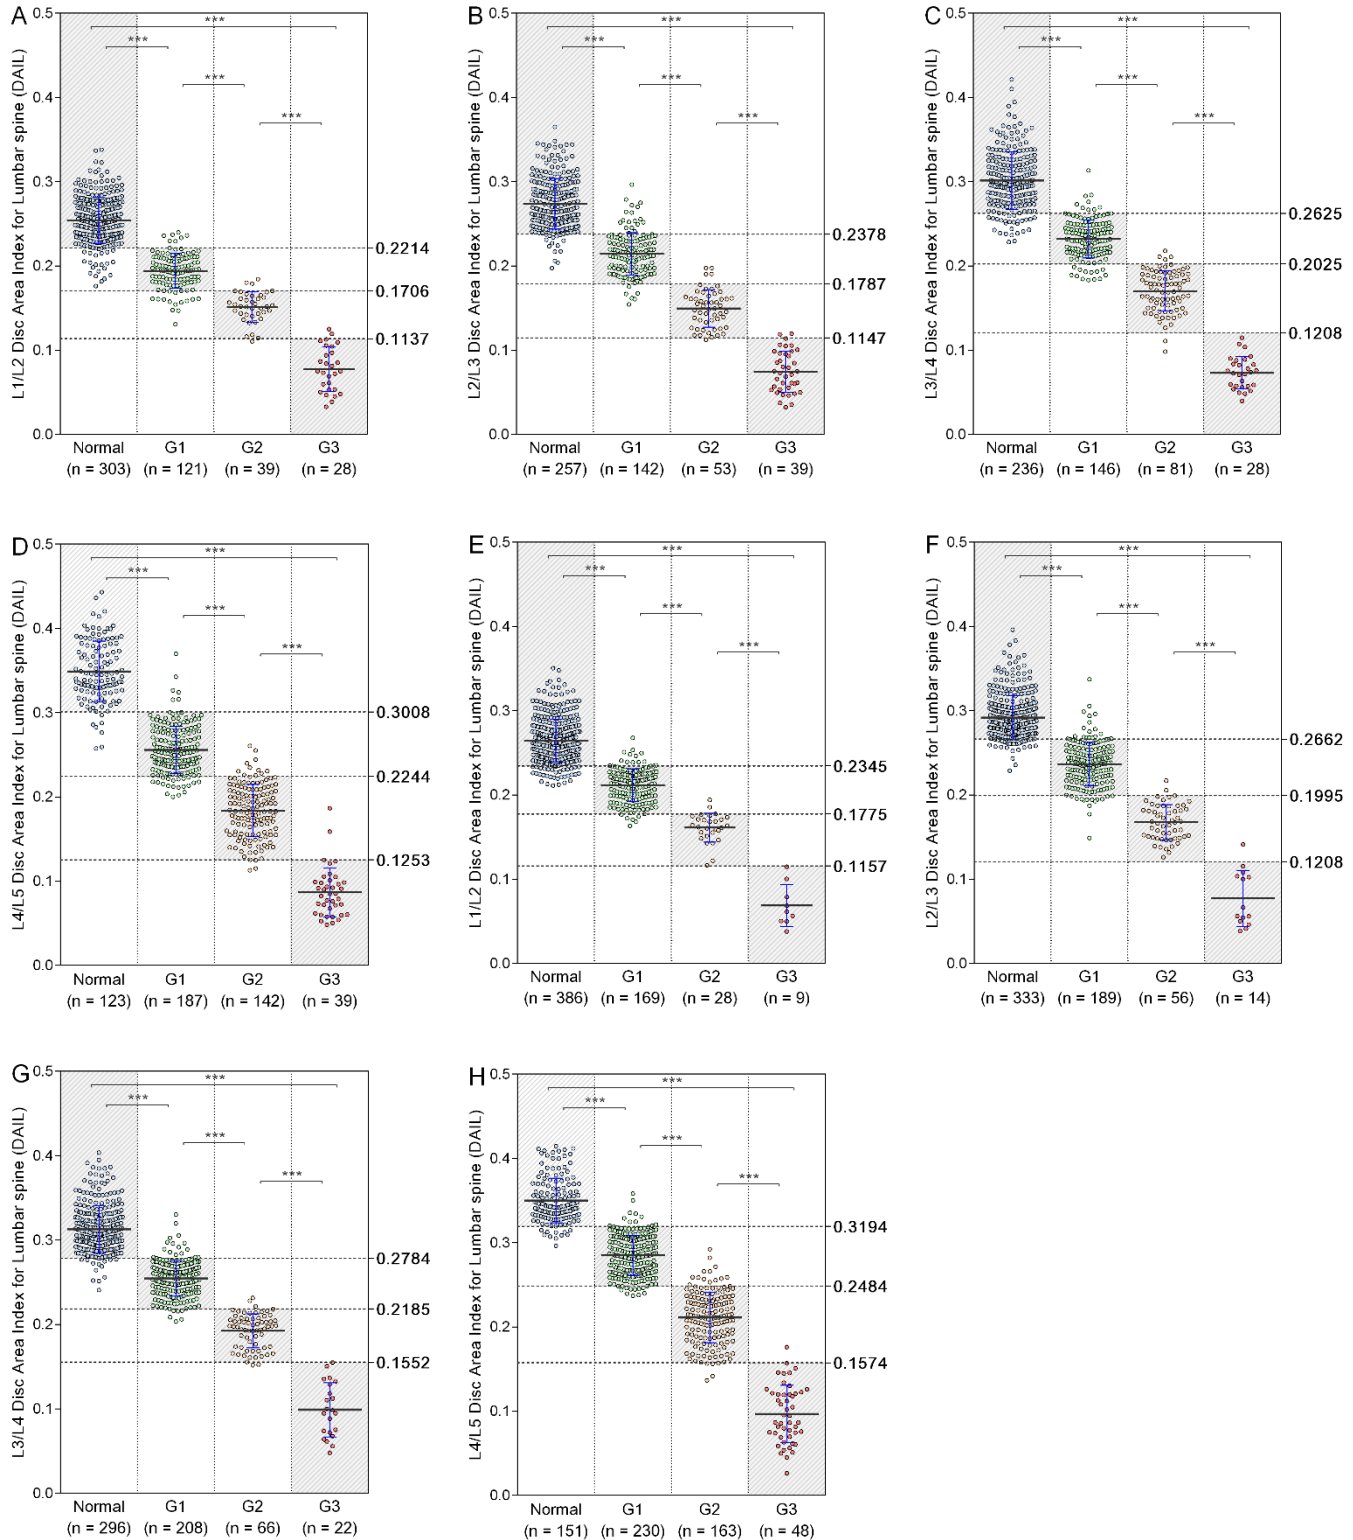



**Supplement Figure 4.** ROC analysis of the DAIL (Disc Area Index for Lumbar Spine) based classification ability for grading disc space narrowing among women and men. **A**, Female L1/L2. **B**, Female L2/L3. **C**, Female L3/L4. **D**, Female L4/L5. **E**, Male L1/L2. **F**, Male L2/L3. **G**, Male L3/L4. **H**, Male L4/L5.

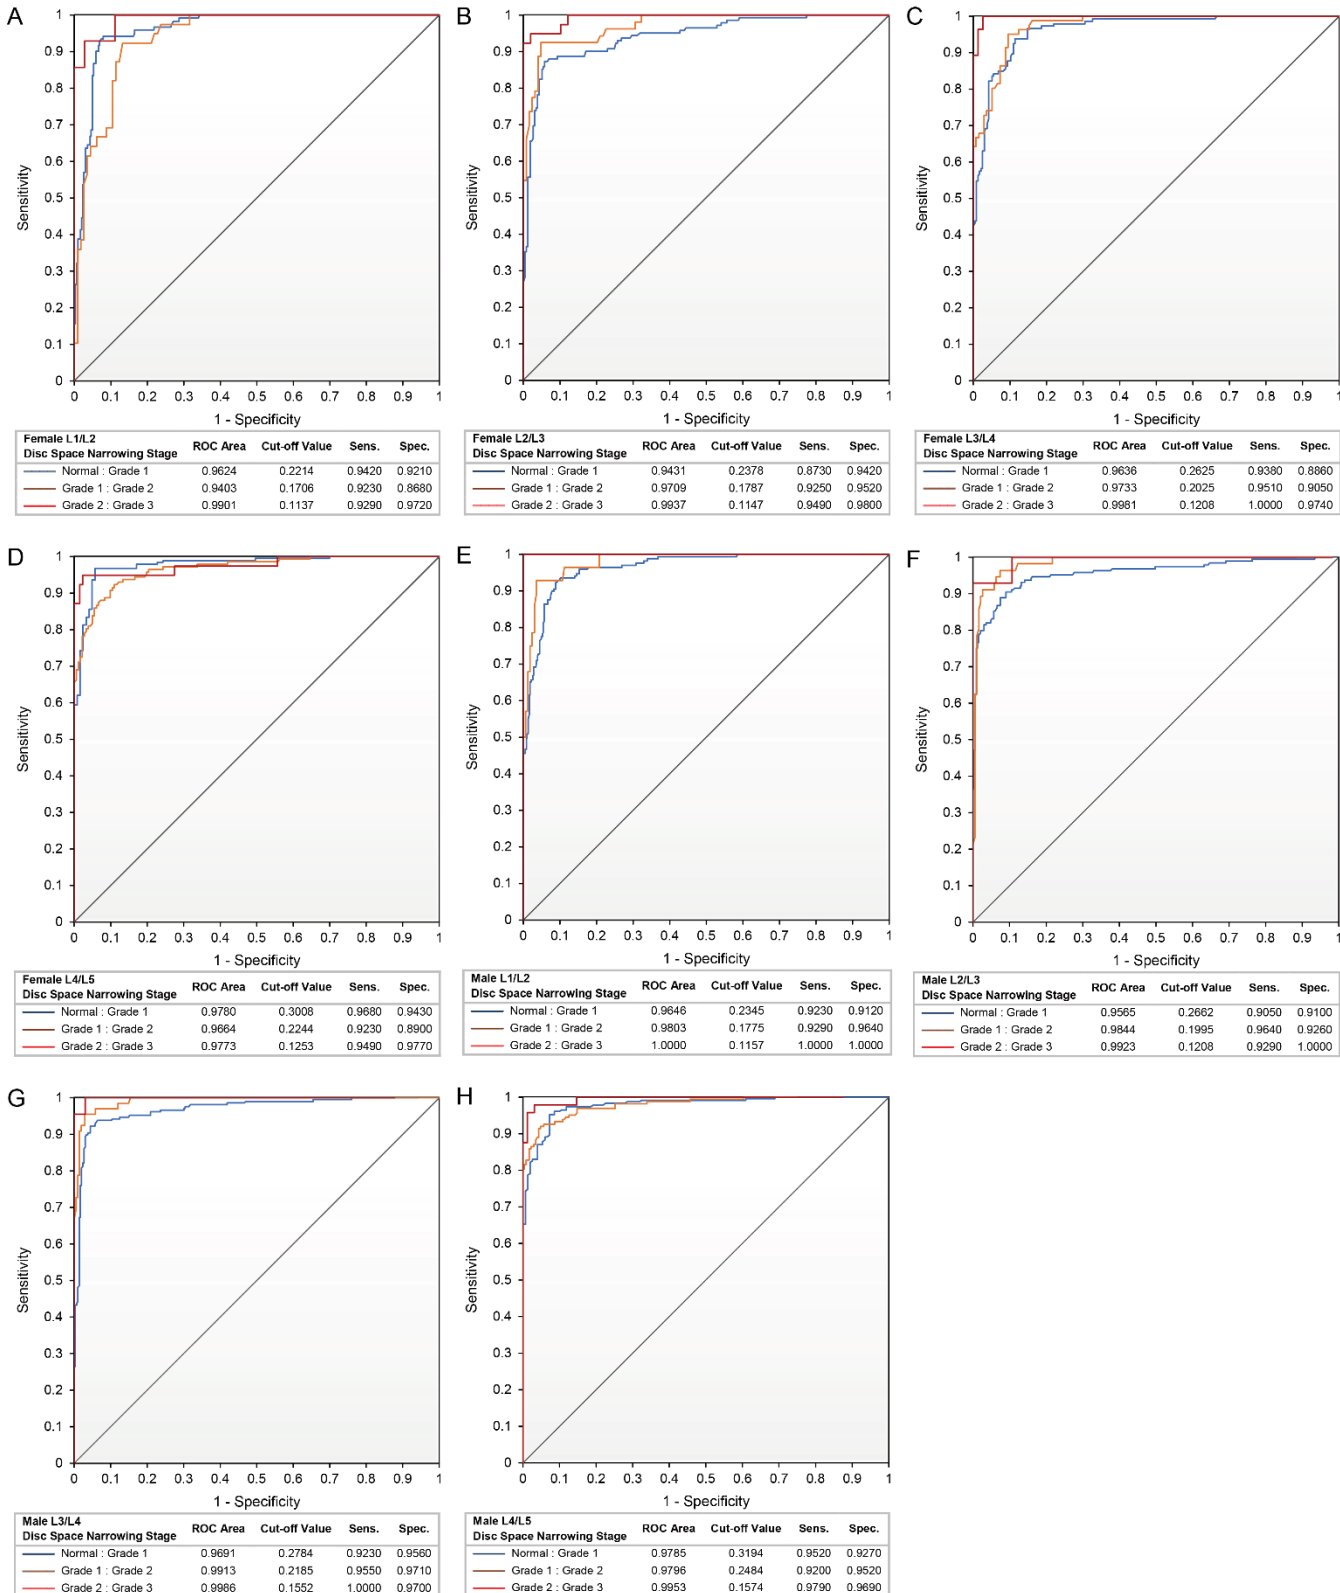



**supplementary table 1**

| Thoracic/lumbar disc heights at baseline and year-4 follow-up among elderly females |              |              |             |                  |              |             |                      |            |            |
|-------------------------------------------------------------------------------------|--------------|--------------|-------------|------------------|--------------|-------------|----------------------|------------|------------|
| Disc Level                                                                          | Baseline     |              |             | Year-4 Follow-up |              |             | 4-Years decrease (%) |            |            |
|                                                                                     | Ha           | Hm           | Hp          | Ha               | Hm           | Hp          | Ha                   | Hm         | Hp         |
| T4/5                                                                                | 31.2 ± 9.0   | 52.3 ± 13.6  | 36.6 ± 11.9 | 30.9 ± 9.1       | 51.4 ± 12.7  | 34.7 ± 10.6 | -0.4 ± 0.18          | 0.2 ± 0.15 | 1.1 ± 0.25 |
| T5/6                                                                                | 35.3 ± 9.7   | 51.3 ± 13.2  | 35.4 ± 11.6 | 34.9 ± 9.9       | 50.4 ± 13.1  | 33.3 ± 10.4 | 0.2 ± 0.16           | 0.9 ± 0.14 | 2.1 ± 0.25 |
| T6/7                                                                                | 40.1 ± 11.4  | 53.1 ± 13.6  | 35.3 ± 10.1 | 39.1 ± 11.4      | 51.4 ± 13.3  | 33.8 ± 10.1 | 1.3 ± 0.19           | 2.4 ± 0.13 | 2.2 ± 0.21 |
| T7/8                                                                                | 44.5 ± 12.6  | 55.5 ± 14.2  | 34.9 ± 10.1 | 43.0 ± 12.2      | 53.3 ± 13.6  | 33.2 ± 9.8  | 2.0 ± 0.17           | 2.8 ± .14  | 3.0 ± 0.19 |
| T8/9                                                                                | 47.8 ± 13.8  | 58.2 ± 14.8  | 34.1 ± 9.6  | 46.5 ± 13.7      | 56.0 ± 14.2  | 32.6 ± 10.0 | 1.8 ± 0.15           | 2.8 ± .13  | 2.8 ± 0.21 |
| T9/10                                                                               | 53.3 ± 15.0  | 62.4 ± 15.4  | 35.8 ± 10.3 | 51.7 ± 13.7      | 60.1 ± 14.5  | 34.3 ± 9.9  | 1.4 ± 0.15           | 2.7 ± .12  | 2.1 ± 0.20 |
| T10/11                                                                              | 60.68 ± 6.1  | 70.7 ± 16.6  | 42.3 ± 11.7 | 58.8 ± 15.5      | 68.1 ± 16.1  | 40.4 ± 11.4 | 2.0 ± 0.14           | 3.1 ± .11  | 3.3 ± 0.16 |
| T11/12                                                                              | 69.8 ± 18.2  | 82.1 ± 19.0  | 51.5 ± 13.9 | 67.2 ± 17.2      | 78.9 ± 18.5  | 48.9 ± 13.3 | 2.7 ± 0.14           | 3.3 ± .11  | 3.7 ± 0.16 |
| Thoracic discs (mean)                                                               | 48.1 ± 18.2  | 60.6 ± 18.1  | 38.3 ± 12.6 | 46.7 ± 17.4      | 58.6 ± 17.3  | 36.4 ± 12.0 | 1.4 ± 0.16           | 2.3 ± .13  | 2.5 ± 0.21 |
| T12/L1                                                                              | 80.7 ± 21.7  | 95.4 ± 22.9  | 55.1 ± 15.2 | 77.2 ± 20.9      | 92.5 ± 22.9  | 52.5 ± 15.2 | 3.6 ± 0.11           | 2.7 ± .10  | 3.7 ± 0.16 |
| L1/2                                                                                | 97.2 ± 28.1  | 107.7 ± 26.6 | 63.2 ± 18.6 | 92.5 ± 26.5      | 104.6 ± 26.8 | 59.9 ± 18.4 | 4.0 ± 0.11           | 2.7 ± .10  | 4.3 ± 0.16 |
| L2/3                                                                                | 114.4 ± 33.6 | 116.7 ± 29.9 | 69.1 ± 20.5 | 109.1 ± 32.2     | 113.5 ± 31.5 | 65.0 ± 20.0 | 3.9 ± 0.12           | 2.7 ± 0.11 | 5.1 ± 0.15 |
| L3/4                                                                                | 134.3 ± 37.6 | 124.9 ± 32.4 | 75.4 ± 23.7 | 128.4 ± 36.9     | 121.4 ± 33.5 | 71.4 ± 23.0 | 3.6 ± 0.13           | 2.8 ± 0.11 | 4.7 ± 0.14 |
| L4/5                                                                                | 145.5 ± 43.3 | 127.4 ± 33.9 | 88.9 ± 28.2 | 138.7 ± 42.7     | 123.0 ± 35.7 | 84.3 ± 29.1 | 4.1 ± 0.14           | 3.5 ± 0.12 | 4.8 ± 0.15 |
| Lumbar discs (mean)                                                                 | 114.8 ± 41.2 | 114.4 ± 31.7 | 70.1 ± 24.3 | 109.6 ± 39.8     | 111.0 ± 32.4 | 66.4 ± 24.0 | 3.9 ± 0.12           | 2.9 ± 0.11 | 4.5 ± 0.15 |

Ha: anterior disc height; Hm: middle disc height; Hp: posterior disc height. Disc heights are presented in pixels which have adjusted that the sizes are the same for baseline and for follow-up.

## supplementary table 2

| Thoracic/lumbar disc heights at baseline and year-4 follow-up among elderly males |             |             |             |                  |             |             |                      |            |            |
|-----------------------------------------------------------------------------------|-------------|-------------|-------------|------------------|-------------|-------------|----------------------|------------|------------|
| Male Disc Level                                                                   | Baseline    |             |             | Year-4 Follow-up |             |             | 4-Years decrease (%) |            |            |
|                                                                                   | Ha          | Hm          | Hp          | Ha               | Hm          | Hp          | Ha                   | Hm         | Hp         |
| T4/5                                                                              | 18.3 ± 4.1  | 34.4 ± 5.2  | 22.3 ± 6.0  | 17.9 ± 4.2       | 33.7 ± 5.7  | 21.5 ± 6.8  | 0.6 ± 0.20           | 1.2 ± 0.15 | 0.4 ± 0.30 |
| T5/6                                                                              | 21.8 ± 4.7  | 34.1 ± 5.0  | 21.9 ± 5.6  | 21.2 ± 5.0       | 33.3 ± 5.3  | 21.2 ± 5.7  | 0.8 ± 0.20           | 1.6 ± 0.14 | 0.5 ± 0.25 |
| T6/7                                                                              | 25.7 ± 5.5  | 35.1 ± 5.5  | 22.1 ± 5.4  | 25.0 ± 5.5       | 34.2 ± 5.9  | 21.3 ± 5.6  | 1.1 ± 0.19           | 1.7 ± 0.15 | 0.8 ± 0.24 |
| T7/8                                                                              | 29.1 ± 5.9  | 37.2 ± 5.4  | 23.0 ± 5.6  | 28.1 ± 5.8       | 36.0 ± 6.2  | 22.0 ± 5.9  | 2.3 ± 0.16           | 2.7 ± 0.14 | 1.7 ± 0.26 |
| T8/9                                                                              | 32.0 ± 6.1  | 39.2 ± 6.0  | 23.2 ± 5.5  | 31.2 ± 6.4       | 38.0 ± 6.4  | 22.2 ± 5.6  | 1.7 ± 0.15           | 2.2 ± 0.15 | 1.5 ± 0.24 |
| T9/10                                                                             | 35.0 ± 6.7  | 42.7 ± 6.3  | 24.1 ± 5.8  | 33.7 ± 6.7       | 41.2 ± 6.7  | 23.0 ± 5.8  | 2.4 ± 0.17           | 3.0 ± 0.13 | 1.6 ± 0.25 |
| T10/11                                                                            | 38.8 ± 7.2  | 48.1 ± 7.1  | 28.6 ± 7.1  | 37.6 ± 7.0       | 46.4 ± 7.3  | 27.4 ± 6.7  | 2.2 ± 0.15           | 2.9 ± 0.12 | 1.3 ± 0.25 |
| T11/12                                                                            | 44.8 ± 8.4  | 55.3 ± 8.0  | 34.5 ± 7.4  | 43.0 ± 8.6       | 53.1 ± 8.5  | 33.2 ± 7.4  | 2.7 ± 0.19           | 3.1 ± 0.14 | 1.7 ± 0.21 |
| Thoracic discs (mean)                                                             | 30.9 ± 10.4 | 40.9 ± 9.4  | 25.1 ± 7.4  | 29.9 ± 10.1      | 39.6 ± 9.4  | 24.1 ± 7.4  | 1.7 ± 0.18           | 2.3 ± 0.14 | 1.2 ± 0.25 |
| T12/L1                                                                            | 52.0 ± 9.2  | 58.1 ± 8.2  | 35.3 ± 7.7  | 50.3 ± 9.0       | 56.5 ± 8.0  | 34.0 ± 8.0  | 2.5 ± 0.13           | 2.1 ± 0.11 | 2.7 ± 0.16 |
| L1/2                                                                              | 64.3 ± 11.4 | 66.9 ± 9.3  | 42.5 ± 8.6  | 62.2 ± 11.4      | 64.9 ± 9.8  | 40.9 ± 8.7  | 2.7 ± 0.12           | 2.6 ± 0.09 | 2.9 ± 0.16 |
| L2/3                                                                              | 74.1 ± 13.4 | 72.6 ± 10.9 | 46.4 ± 9.1  | 71.5 ± 13.7      | 70.4 ± 11.7 | 44.6 ± 9.4  | 3.0 ± 0.12           | 2.9 ± 0.09 | 3.1 ± 0.14 |
| L3/4                                                                              | 83.2 ± 14.5 | 76.0 ± 12.4 | 49.8 ± 10.4 | 80.0 ± 14.6      | 73.3 ± 12.7 | 47.6 ± 10.5 | 3.4 ± 0.11           | 3.3 ± 0.09 | 3.7 ± 0.13 |
| L4/5                                                                              | 88.4 ± 19.5 | 76.6 ± 15.3 | 52.3 ± 12.9 | 84.4 ± 19.4      | 73.5 ± 15.3 | 49.6 ± 12.9 | 3.8 ± 0.14           | 3.6 ± 0.10 | 4.1 ± 0.17 |
| Lumbar discs (mean)                                                               | 72.5 ± 19.2 | 69.9 ± 13.4 | 45.6 ± 11.5 | 69.8 ± 18.7      | 67.6 ± 13.3 | 43.6 ± 11.4 | 3.1 ± 0.12           | 2.9 ± 0.10 | 3.3 ± 0.15 |

Ha: anterior disc height; Hm: middle disc height; Hp: posterior disc height. Disc heights are presented in pixels which have adjusted that the sizes are the same for baseline and for follow-up.
